# Supplementary material
Source: publisher site journal article supplement (https://www.dovepress.com/article/455427)
Supplement: Supplementary file 1 [file get_supplementary_file.php]

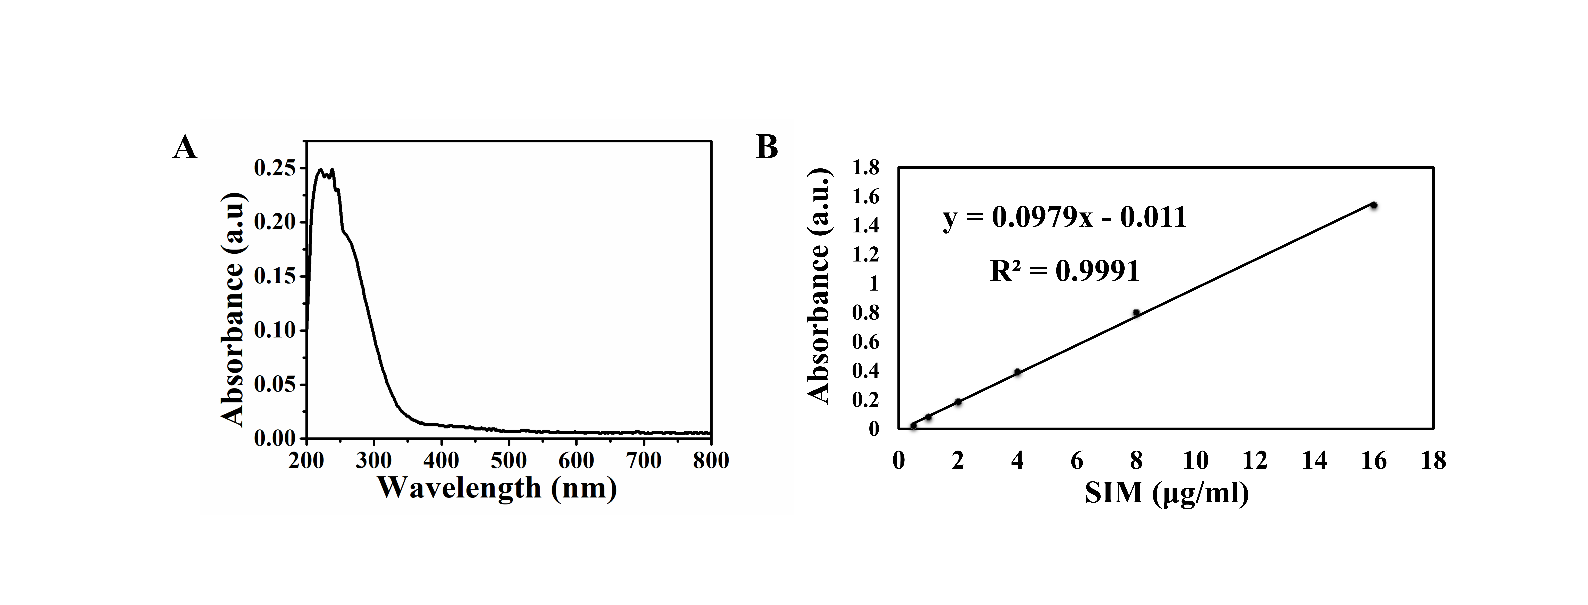


Figure S1 (A) Ultraviolet full wavelength scanning curve of SIM; (B) Correction curve of SIM in methanol


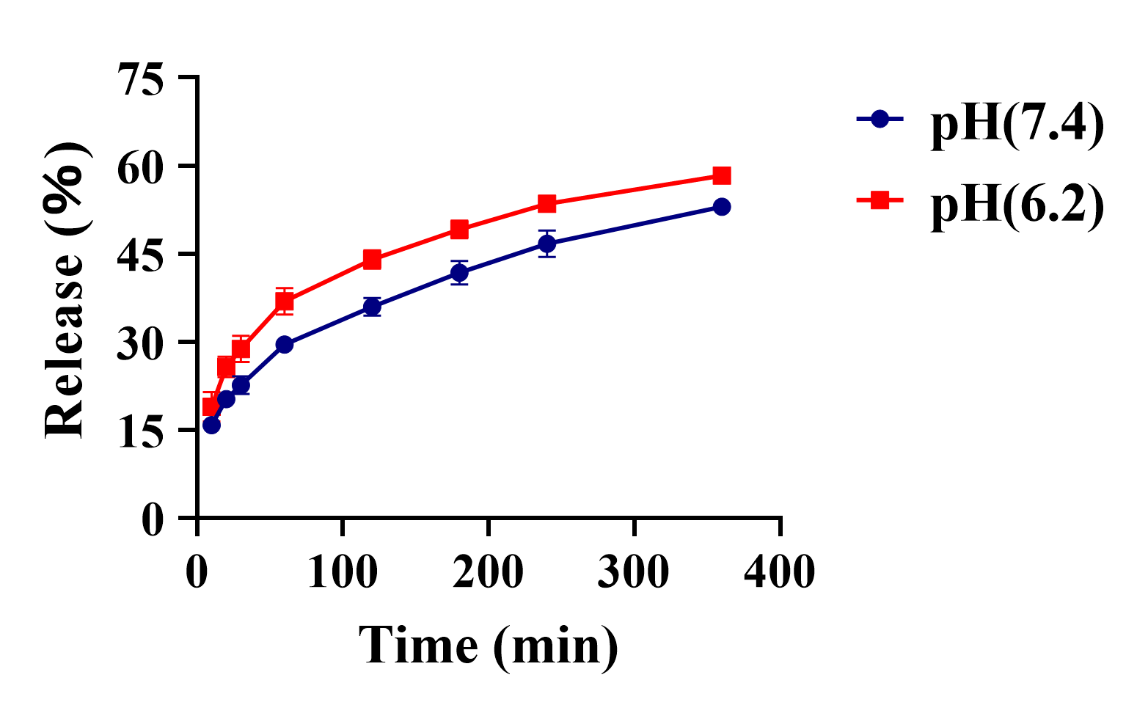


Figure S2 Drug release curves of LDHs-SIM in phosphate buffers at pH=6.2 and 7.4
